# Supplementary material
Source: publisher figshare collection journal article supplement (https://acs.figshare.com/ndownloader/files/5723142)
Supplement: Supplementary file 1 [file 5723142]

## Supporting Information

- Figure 7 Hydrogen bonding pattern including the C(-H)···O interactions for [C<sub>3</sub>N<sub>2</sub>H<sub>5</sub>][O<sub>2</sub>P(OMe)<sub>2</sub>] [ref. 13(a)] and [C<sub>3</sub>N<sub>2</sub>H<sub>5</sub>][O<sub>2</sub>P(OPh)<sub>2</sub>][ref. 10]. Coordinates taken from Cambridge Data Base. S2
- Figure 8 (a) An ORTEP drawing of **1** (triclinic form) (b) An ORTEP drawing of **1** (monoclinic form). S3
- Figure 9 An ORTEP drawing of **1**.EtOH showing the non-hydrogen atoms and numbering scheme. S4
- Figure 10 An ORTEP drawing of **1**.MeOH showing the non-hydrogen atoms. S5
- Figure 11 An ORTEP drawing of **3** showing the numbering scheme; only the asymmetric unit is shown. S6
- Figure 12 ORTEP drawings of the non-hydrogen atoms in **4**; for clarity, the drawing for (a) the phosphate at P(1), K-18-crown-6 and the THF molecules, and (b) phosphate at P(2) are done separately. The THF molecules are not involved in any discernible hydrogen bonding. S7
- Figure 13 An ORTEP drawing of **5**. S8
- Figure 14 (a) and (b) ORTEP drawing of **6**; only non-hydrogen atoms are shown. S9
- Figure 15 An ORTEP drawing for **7**. S10

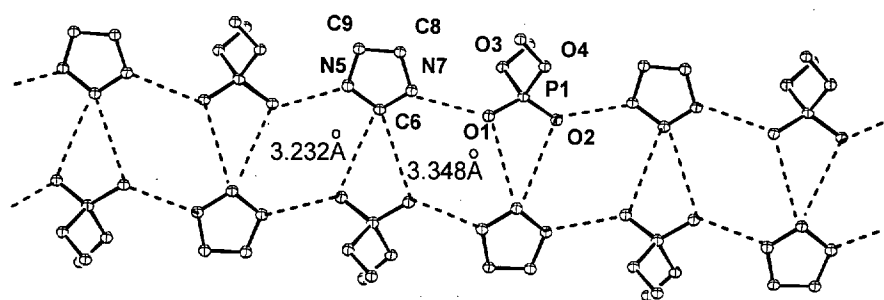

(a)

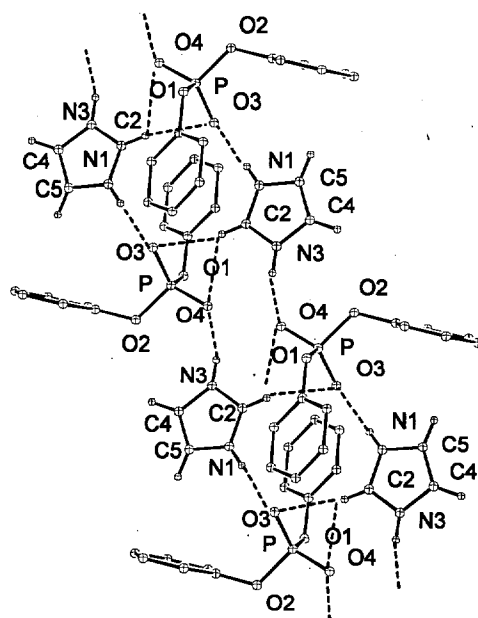

(b)

Fig. 7 (a) Hydrogen bonding pattern including the C(-H)⋯O interactions for  $[\text{C}_3\text{N}_2\text{H}_5][\text{O}_2\text{P}(\text{OMe})_2]$  [ref. 10(a)]. Coordinates taken from Cambridge data base; hydrogen coordinates not available. There could also be weak intermolecular interactions involving C(8) and C(9) [C(8)⋯O(2) 3.420 Å; C(9)⋯O(1) 3.269 Å]. (b) Hydrogen bonding pattern including the C(-H)⋯O interactions for  $[\text{C}_3\text{N}_2\text{H}_5][\text{O}_2\text{P}(\text{OPh})_2]$  [ref. 10(b)]. Coordinates taken from Cambridge data base. C-H⋯O parameters: (i) C(2)-H-O(4) 0.873, 2.720, 3.333 Å, 128.3°; (ii) C(2)-H-O(3) 0.873, 2.608, 3.454 Å, 163.6°. The bifurcated mode of C-H⋯O interactions may be compared to that in (a).

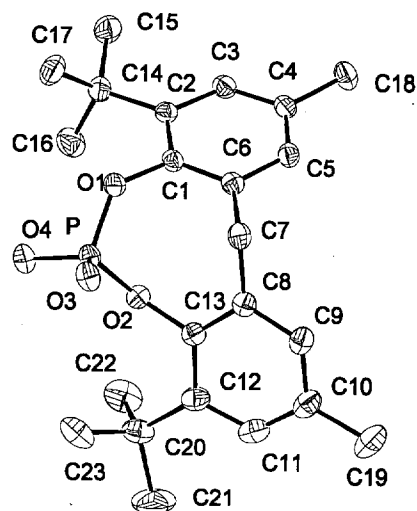

Figure 8

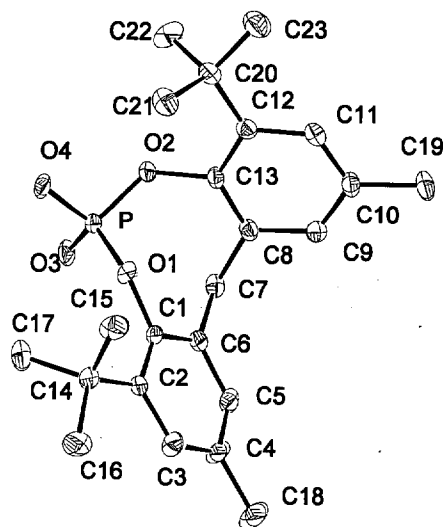

(b)

Figure 8 (a) An ORTEP drawing of **1** (triclinic form) (b) An ORTEP drawing of **1** (monoclinic form). Only non-hydrogen atoms are shown.

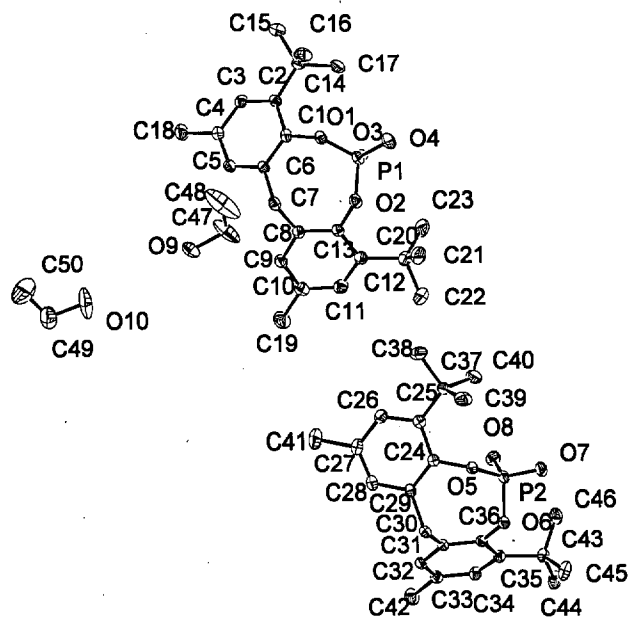

Figure 9 An ORTEP drawing of 1.EtOH showing the non-hydrogen atoms and numbering scheme.

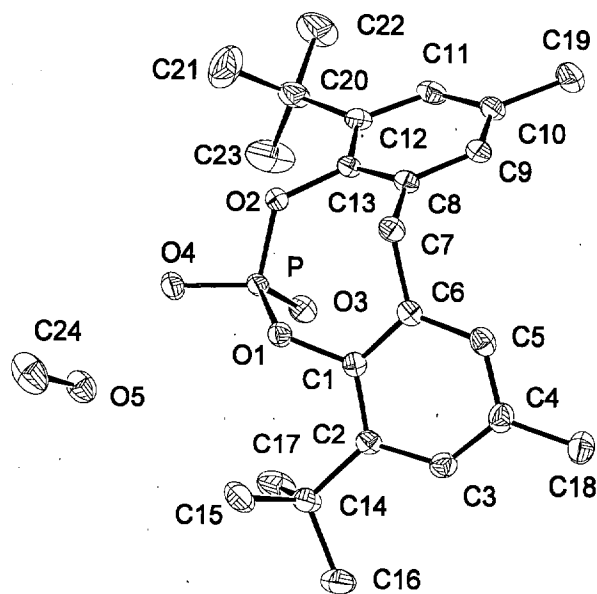

Figure 10 An ORTEP drawing of 1.MeOH; only non-hydrogen atoms shown.

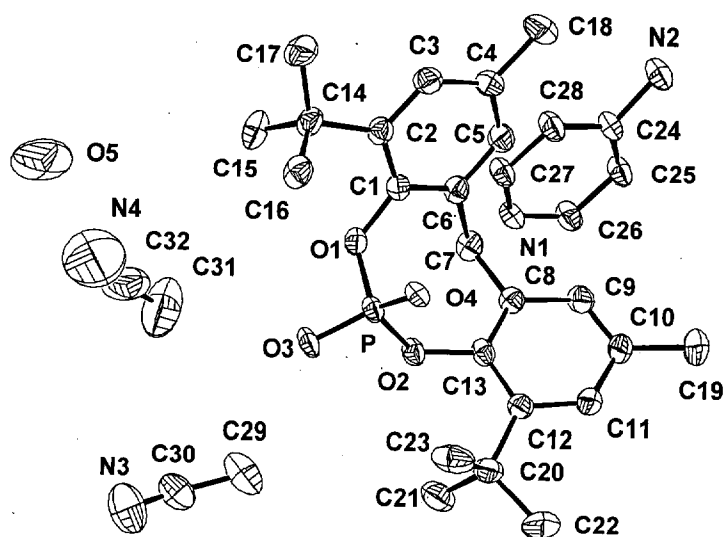

Figure 11 An ORTEP drawing of **3** showing the numbering scheme; only the asymmetric unit is shown.

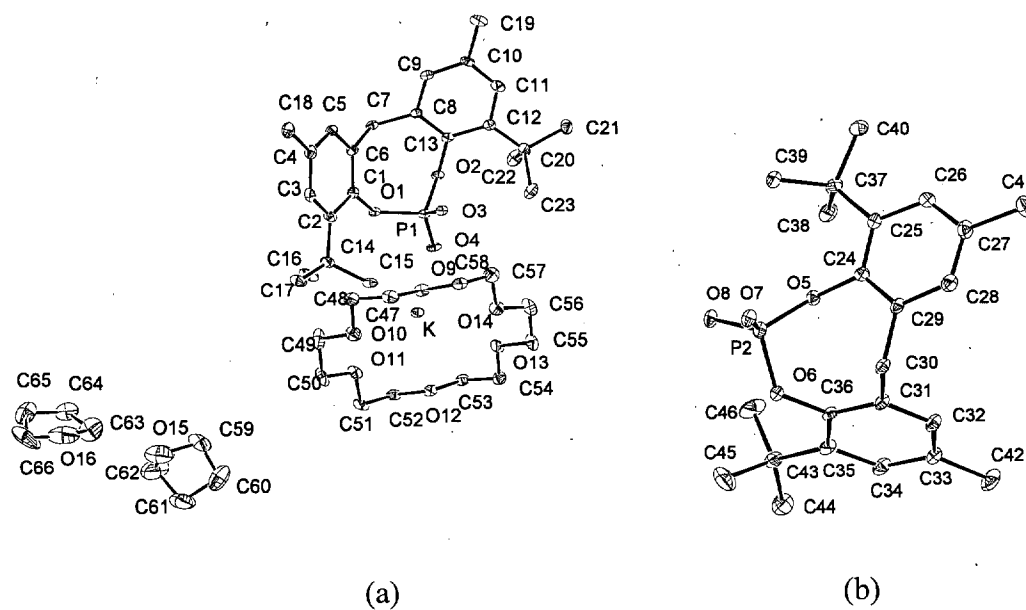

Figure 12 ORTEP drawings of the non-hydrogen atoms in 4; for clarity, the drawing for (a) the phosphate at P(1), K-18-crown-6 and the THF molecules, and (b) phosphate at P(2) are done separately. The THF molecules are not involved in any discernible hydrogen bonding.

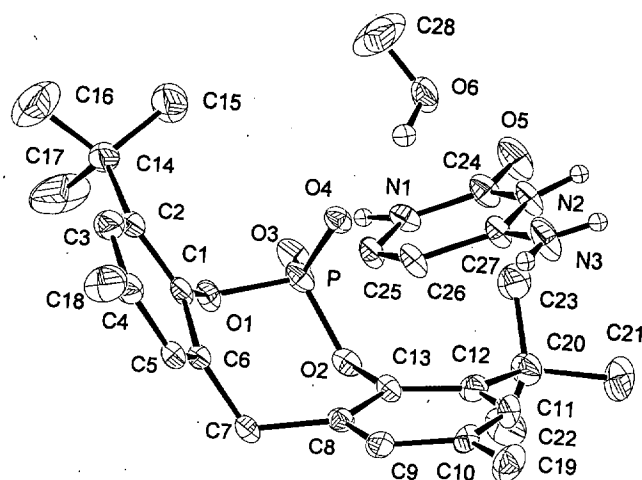

Figure 13 An ORTEP drawing of 5.



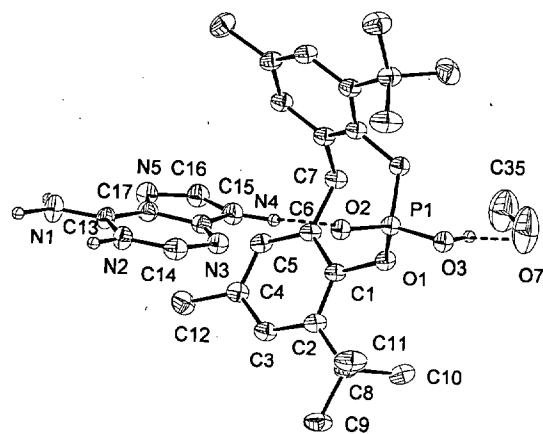

(a)

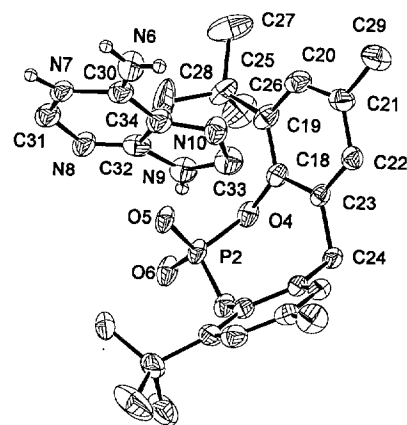

(b)

Fig. 14(a) and (b) ORTEP drawing of **6**; only non-hydrogen atoms are shown. Note that only the phosphate at P(1) is hydrogen bonded to MeOH.

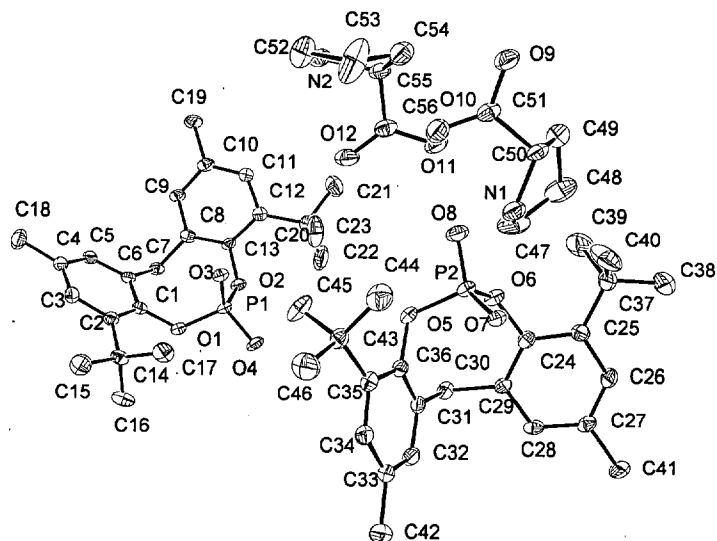

Figure 15 An ORTEP drawing of 7; only non-hydrogen atoms are shown.
